# Supplementary material for: Insufficient yet improving involvement of the global south in top sustainability science publications
Source: PLOS journal article supplement (doi:10.1371/journal.pone.0273083), 2022-09-01

**S2 Figure:** Co-authorship of LLMIC authors in *Nature Sustainability Local study* publications (2018-2021). *Local study* articles are those carried out in one specific country (see Material and Methods).

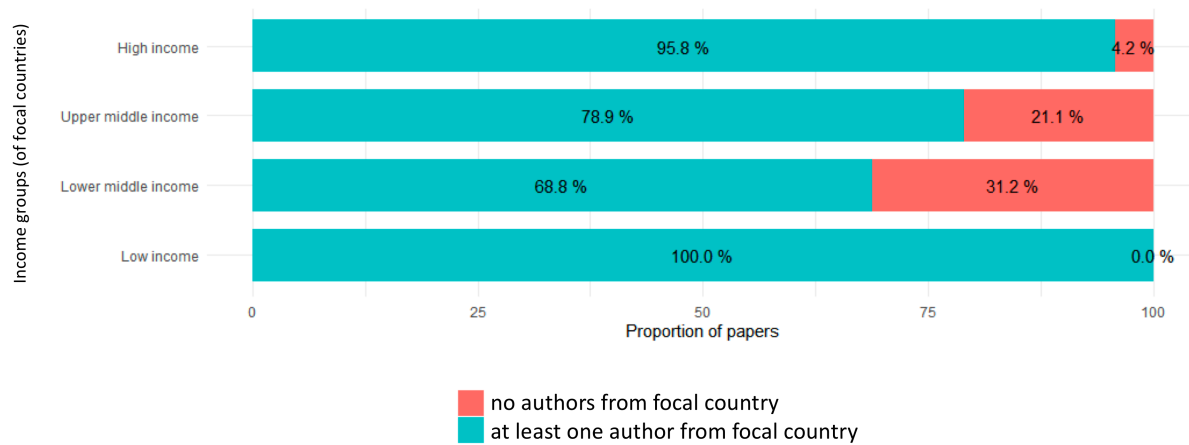

Supplement: S2 (10.1371/journal.pone.0273083.s002) [file journal.pone.0273083.s002]
